# Supplementary material for: Modulation of Gut Microbiota in Korean Navy Trainees following a Healthy Lifestyle Change
Source: PubMed Central journal article supplement (PMC7569816; doi:10.3390/microorganisms8091265), 2020-08-20
Supplement: microorganisms-08-01265-s001.pdf [file microorganisms-08-01265-s001.pdf]

# Supplementary materials

## Modulation of gut microbiota in Korean navy trainees following a healthy lifestyle change

YeonGyun Jung <sup>1</sup>, Setu Bazie Tagele <sup>1,2</sup>, HyunWoo Son <sup>1</sup>, Jerald Conrad Ibal <sup>1</sup>, Dorsaf Kerfahi <sup>3</sup>, Hyunju Yun <sup>4</sup>, Bora Lee <sup>4</sup>, Clara Yongjoo Park <sup>4</sup>, Eun Soo Kim <sup>5</sup>, Sang-Jun Kim <sup>6</sup>, and Jae-Ho Shin <sup>1\*</sup>

<sup>1</sup> School of Applied Biosciences, Kyungpook National University, Daegu, Republic of Korea; jyg1076@knu.ac.kr (Y.J.); setubazie@gmail.com (S.B.T); thsgusdn2@knu.ac.kr (H.S.); jerald.ibal@gmail.com (J.C.I.)

<sup>2</sup> Department of Applied Plant Sciences, University of Gondar, Ethiopia

<sup>3</sup> Department of Biological Sciences, Keimyung University, Daegu, Republic of Korea; kerfahi.dorsaf@gmail.com

<sup>4</sup> Department of Food and Nutrition, Chonnam National University, Gwangju, Republic of Korea; virt0323@naver.com (H.Y.); lbr1074@naver.com (B.L.); parkcy@jnu.ac.kr (C.Y.P.)

<sup>5</sup> Department of Internal Medicine, School of Medicine, Kyungpook National University, Daegu, Republic of Korea; dandy813@hanmail.net

<sup>6</sup> Department of Natural Sciences, Republic of Korea Naval Academy, Changwon, Republic of Korea; sjkim1963@navy.mil.kr

\* Correspondence: jhshin@knu.ac.kr; Tel.: +82-53-950-5716; Fax: +82-53-953-7233

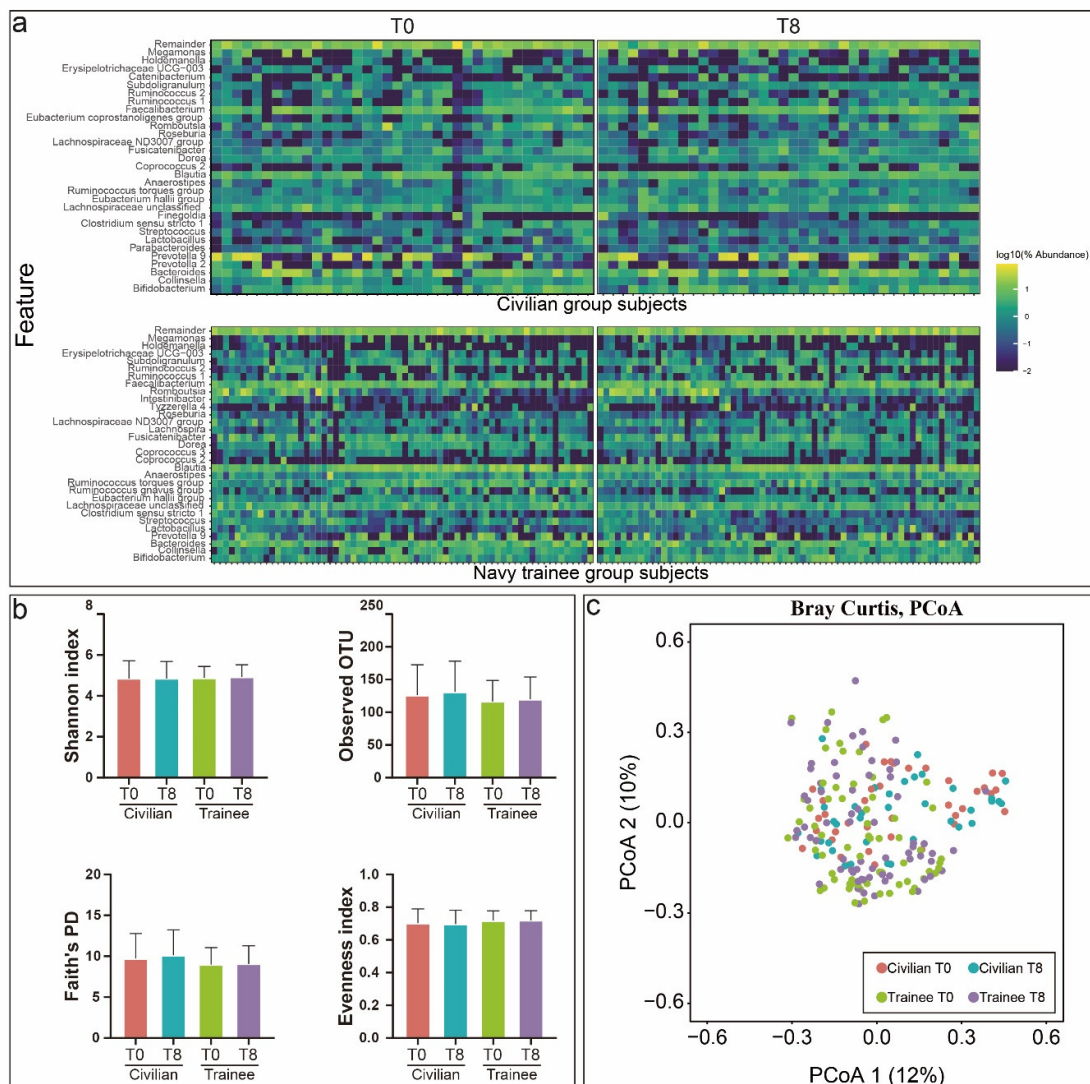

**Figure S1.** Microbial community composition and diversity of all participants at T0 and T8. (a) A heatmap depicting the abundance of the top 30 genera at T0 and T8 weeks. The color scale represents the  $\log_{10}+1$  transformed relative abundance of the number of sequences. (b) Principal component analysis (PCoA) plot based on the Bray–Curtis distance showing the microbiota of civilian and navy trainee groups. (c)  $\alpha$ -diversity of microbiota in civilian and navy trainee groups. Data are shown as mean  $\pm$  SD.

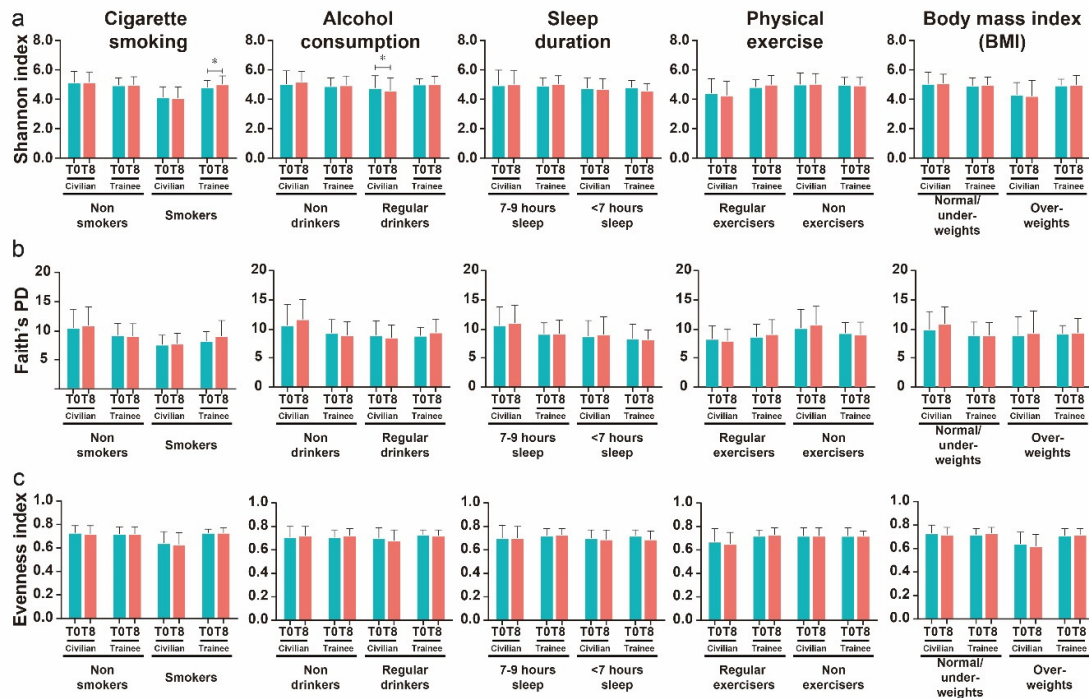

**Figure S2.** Microbial diversity of civilian and navy trainee groups at T0 and T8. Shannon index (a), Faith's PD (b), and Evenness index (c) in different categories of lifestyle factors in civilian and navy trainee groups at T0 and T8. Values are expressed as means  $\pm$  SEM. Asterisk (\*) indicates statistically significant ( $p < 0.05$ ) differences between groups based on Wilcoxon matched-pairs signed-rank test. At T8, the navy trainees stopped smoking and drinking alcohol, instructed to do physical exercise for 5 h per day and obey an 8 h sleep schedule.

**Table S1.** Baseline characteristics of participants in the study

| Characteristic                            | Civilian Group<br>( <i>n</i> = 38) | Navy trainee Group<br>( <i>n</i> = 66) |
|-------------------------------------------|------------------------------------|----------------------------------------|
| Gender                                    |                                    |                                        |
| Male <i>n</i> (%)                         | 22 (57.89)                         | 55 (83.33)                             |
| Female <i>n</i> (%)                       | 16 (42.11)                         | 11 (16.67)                             |
| Age                                       | 30.03 $\pm$ 8.76                   | 23.88 $\pm$ 1.91                       |
| Height, (cm)                              | 169.50 $\pm$ 8.41                  | 171.80 $\pm$ 6.94                      |
| Weight, (kg)                              | 66.42 $\pm$ 13.09                  | 72.77 $\pm$ 10.94                      |
| Body mass index (BMI, kg/m <sup>2</sup> ) |                                    |                                        |
| < 18.50 <i>n</i> (%)                      | 2 (5.26)                           | 1 (1.52)                               |
| 18.50–24.99 <i>n</i> (%)                  | 26 (68.42)                         | 38 (57.58)                             |
| 25.00–29.99 <i>n</i> (%)                  | 10 (26.32)                         | 22 (33.33)                             |
| Cigarettes consumption                    |                                    |                                        |
| Smokers <i>n</i> (%)                      | 11 (28.95)                         | 14 (21.21)                             |
| Non-smokers <i>n</i> (%)                  | 27 (71.05)                         | 47 (71.21)                             |
| No Answer <i>n</i> (%)                    | 0 (0.00)                           | 5 (7.58)                               |
| Cigarettes smoked per day                 | 15.55 $\pm$ 6.39                   | 9.93 $\pm$ 4.62                        |
| Alcohol consumption                       |                                    |                                        |
| Drinker <i>n</i> (%)                      | 18 (47.37)                         | 23 (34.85)                             |
| Non-drinker <i>n</i> (%)                  | 18 (47.37)                         | 28 (42.42)                             |
| No Answer <i>n</i> (%)                    | 0 (0.00)                           | 5 (7.58)                               |

|                                                            |                  |                  |
|------------------------------------------------------------|------------------|------------------|
| Alcohol consumption days per week                          | 1.67 ± 0.97      | 2.00 ± 1.31      |
| Sleep time (hours per day)                                 | 6.51 ± 0.96      | 7.69 ± 1.29      |
| Sleep quality                                              |                  |                  |
| Very Bad <i>n</i> (%)                                      | 3 (7.89)         | 0 (0.00)         |
| Bad <i>n</i> (%)                                           | 3 (7.89)         | 4 (6.06)         |
| Normal <i>n</i> (%)                                        | 12 (31.58)       | 35 (53.03)       |
| Good <i>n</i> (%)                                          | 16 (42.11)       | 17 (25.73)       |
| Very Good <i>n</i> (%)                                     | 4 (10.53)        | 4 (6.06)         |
| No Answer <i>n</i> (%)                                     | 0 (0.00)         | 6 (9.09)         |
| Physical exercise                                          |                  |                  |
| Regular exercise for more than 2 hours a week <i>n</i> (%) | 10 (26.32)       | 26 (39.39)       |
| Non exercise <i>n</i> (%)                                  | 28 (73.68)       | 35 (53.03)       |
| No Answer <i>n</i> (%)                                     | 0 (0.00)         | 5 (7.58)         |
| Kind of physical exercise                                  |                  |                  |
| Weight training <i>n</i> (%)                               | 1 (10.00)        | 4 (15.38)        |
| Cardio <i>n</i> (%)                                        | 1 (10.00)        | 1 (3.85)         |
| Both <i>n</i> (%)                                          | 8 (80.00)        | 21 (80.77)       |
| Exercise duration in the past week, (min)                  | 305.5 ± 213.5    | 390.6 ± 204.2    |
| Number of people living together ( <i>n</i> )              | 2.66 ± 1.48      | 3.38 ± 1.36      |
| Presence of companion animals                              |                  |                  |
| Yes <i>n</i> (%)                                           | 5 (13.16)        | 14 (21.21)       |
| No <i>n</i> (%)                                            | 33 (86.84)       | 46 (69.70)       |
| No Answer <i>n</i> (%)                                     | 0 (0.00)         | 6 (9.09)         |
| Number of bowel movement a week                            | 6.26 ± 3.24      | 6.75 ± 3.09      |
| Feeling after a bowel movement                             |                  |                  |
| Bad                                                        | 2 (5.26)         | 1 (1.52)         |
| Normal                                                     | 13 (34.21)       | 28 (42.42)       |
| Good                                                       | 19 (50.00)       | 26 (39.39)       |
| Very Good                                                  | 4 (10.53)        | 6 (9.09)         |
| No Answer                                                  | 0 (0.00)         | 5 (7.58)         |
| Number of days feeling happy in the last week              | 2.90 ± 2.30      | 4.32 ± 1.92      |
| Number of days feeling severely depressed past week        | 1.05 ± 1.51      | 0.46 ± 1.07      |
| Physical and mental health condition                       |                  |                  |
| Very Bad                                                   | 1 (2.63)         | 0 (0)            |
| Bad                                                        | 10 (26.32)       | 2 (3.03)         |
| Normal                                                     | 11 (28.95)       | 18 (27.27)       |
| Good                                                       | 14 (36.84)       | 33 (50)          |
| Very Good                                                  | 2 (5.26)         | 6 (9.09)         |
| No Answer                                                  | 0 (0)            | 7 (10.61)        |
| Daily intake <sup>1</sup>                                  |                  |                  |
| Energy (kcal)                                              | 1939.00 ± 749.70 | 2375.00 ± 901.40 |
| Carbohydrate (g)                                           | 286.40 ± 111.40  | 343.30 ± 141.40  |
| Protein (g)                                                | 67.94 ± 30.62    | 86.64 ± 41.35    |
| Fat (g)                                                    | 50.27 ± 26.66    | 61.14 ± 29.46    |
| Cholesterol (g)                                            | 313.80 ± 216.00  | 371.60 ± 199.80  |
| Fiber (mg)                                                 | 15.72 ± 7.55     | 19.63 ± 12.93    |

<sup>1</sup>Daily nutrient intake were adjusted subject number; civilian group (n = 34), navy trainee group (n = 25); FFQ non-responders were excluded. Data are shown as mean ± SD (standard deviation). *n* refers to the number of subjects participated in each group.

1

**Table S2.** Feature selection analysis for gut microbiome in civilian and navy trainee group at T0 vs. T8

| Group                                 | Phylum           | Class               | Order               | Family                 | Genus                             | <sup>1</sup> logFC | <sup>1</sup> logCPM | p-Value  | <sup>2</sup> FDR |
|---------------------------------------|------------------|---------------------|---------------------|------------------------|-----------------------------------|--------------------|---------------------|----------|------------------|
| Civilian<br>group<br>T0 vs. T8        | Firmicutes       | Bacilli             | Lactobacillales     | Lactobacillaceae       | <i>Lactobacillus</i>              | -4.608             | 10.185              | 2.77E-12 | 3.22E-10         |
|                                       | Firmicutes       | Bacilli             | Lactobacillales     | Streptococcaceae       | <i>Lactococcus</i>                | 4.237              | 10.070              | 5.56E-12 | 3.22E-10         |
|                                       | Actinobacteria   | Actinobacteria      | Bifidobacteriales   | Bifidobacteriaceae     | <i>Gardnerella</i>                | -4.398             | 10.033              | 7.55E-12 | 3.22E-10         |
|                                       | Proteobacteria   | Gammaproteobacteria | Pseudomonadales     | Pseudomonadaceae       | <i>Pseudomonas</i>                | -4.173             | 9.895               | 1.06E-11 | 3.40E-10         |
|                                       | Firmicutes       | Clostridia          | Clostridiales       | Family XI              | <i>Anaerococcus</i>               | -4.797             | 11.793              | 8.85E-10 | 2.27E-08         |
|                                       | Actinobacteria   | Actinobacteria      | Propionibacteriales | Propionibacteriaceae   | <i>Cutibacterium</i>              | -3.137             | 9.604               | 3.36E-08 | 5.75E-07         |
|                                       | Firmicutes       | Clostridia          | Clostridiales       | Family XI              | <i>Ezakiella</i>                  | -3.941             | 11.202              | 3.84E-08 | 5.75E-07         |
|                                       | Firmicutes       | Clostridia          | Clostridiales       | Family XI              | <i>Anaerococcus</i>               | -3.684             | 10.302              | 4.04E-08 | 5.75E-07         |
|                                       | Firmicutes       | Clostridia          | Clostridiales       | Family XI              | <i>Anaerococcus</i>               | -3.646             | 10.526              | 5.10E-08 | 6.17E-07         |
|                                       | Bacteroidetes    | Bacteroidia         | Bacteroidales       | Porphyromonadaceae     | <i>Porphyromonas</i>              | -3.929             | 11.017              | 5.30E-08 | 6.17E-07         |
|                                       | Firmicutes       | Bacilli             | Lactobacillales     | Streptococcaceae       | <i>Streptococcus</i>              | -3.040             | 9.384               | 1.63E-07 | 1.74E-06         |
|                                       | Firmicutes       | Clostridia          | Clostridiales       | Family XI              | <i>Ezakiella</i>                  | -3.947             | 12.319              | 4.98E-07 | 4.91E-06         |
|                                       | Firmicutes       | Clostridia          | Clostridiales       | Family XI              | <i>Peptoniphilus</i>              | -2.398             | 10.989              | 6.09E-04 | 5.01E-03         |
|                                       | Firmicutes       | Clostridia          | Clostridiales       | Family XI              | <i>Peptoniphilus</i>              | -2.184             | 10.350              | 6.26E-04 | 5.01E-03         |
|                                       | Firmicutes       | Clostridia          | Clostridiales       | Christensenellaceae    | Christensenellaceae R-7 group     | 2.000              | 10.959              | 1.28E-03 | 9.62E-03         |
|                                       | Firmicutes       | Clostridia          | Clostridiales       | Family XI              | <i>Peptoniphilus</i>              | -2.343             | 11.662              | 1.67E-03 | 1.17E-02         |
|                                       | Firmicutes       | Clostridia          | Clostridiales       | Lachnospiraceae        | <i>Ruminococcus torques</i> group | 1.923              | 10.630              | 1.74E-03 | 1.17E-02         |
|                                       | Firmicutes       | Clostridia          | Clostridiales       | Lachnospiraceae        | <i>Anaerostipes</i>               | 1.712              | 9.325               | 2.12E-03 | 1.36E-02         |
|                                       | Firmicutes       | Clostridia          | Clostridiales       | Lachnospiraceae        | <i>Roseburia</i>                  | 1.881              | 12.087              | 6.55E-03 | 3.98E-02         |
|                                       | Firmicutes       | Clostridia          | Clostridiales       | Family XI              | <i>Anaerococcus</i>               | -1.874             | 10.877              | 6.84E-03 | 3.98E-02         |
| Actinobacteria                        | Actinobacteria   | Bifidobacteriales   | Bifidobacteriaceae  | <i>Bifidobacterium</i> | 5.184                             | 10.937             | 7.38E-27            | 1.05E-24 |                  |
| Firmicutes                            | Clostridia       | Clostridiales       | Family XI           | <i>Murdochella</i>     | 3.494                             | 9.641              | 1.28E-14            | 6.05E-13 |                  |
| Firmicutes                            | Clostridia       | Clostridiales       | Family XI           | <i>Peptoniphilus</i>   | 3.262                             | 9.352              | 7.09E-14            | 2.52E-12 |                  |
| Navy<br>trainee<br>group<br>T0 vs. T8 | Firmicutes       | Clostridia          | Clostridiales       | Family XIII            | <i>Mogibacterium</i>              | 3.134              | 9.229               | 1.92E-13 | 5.45E-12         |
| Firmicutes                            | Erysipelotrichia | Erysipelotrichales  | Erysipelotrichaceae | <i>Turicibacter</i>    | -3.408                            | 10.416             | 7.91E-13            | 1.87E-11 |                  |
| Firmicutes                            | Clostridia       | Clostridiales       | Ruminococcaceae     | <i>Ruminococcus</i> 2  | -4.008                            | 11.093             | 1.02E-12            | 1.88E-11 |                  |
| Firmicutes                            | Clostridia       | Clostridiales       | Family XIII         | S5-A14a                | 3.055                             | 9.283              | 1.06E-12            | 1.88E-11 |                  |
| Firmicutes                            | Clostridia       | Clostridiales       | Lachnospiraceae     | <i>Coproccoccus</i> 2  | 3.056                             | 9.410              | 2.32E-12            | 3.62E-11 |                  |
| Firmicutes                            | Clostridia       | Clostridiales       | Ruminococcaceae     | <i>Ruminococcus</i> 2  | 3.591                             | 10.382             | 2.55E-12            | 3.62E-11 |                  |
| Firmicutes                            | Erysipelotrichia | Erysipelotrichales  | Erysipelotrichaceae | <i>Holdemanella</i>    | -3.622                            | 10.731             | 1.76E-11            | 2.27E-10 |                  |

|                |                     |                    |                       |                                                         |        |        |          |          |
|----------------|---------------------|--------------------|-----------------------|---------------------------------------------------------|--------|--------|----------|----------|
| Firmicutes     | Clostridia          | Clostridiales      | Family XI             | <i>Ezakiella</i>                                        | 2.880  | 9.863  | 7.01E-10 | 8.29E-09 |
| Firmicutes     | Bacilli             | Lactobacillales    | Streptococcaceae      | <i>Streptococcus</i>                                    | -3.547 | 11.800 | 1.46E-09 | 1.60E-08 |
| Firmicutes     | Bacilli             | Lactobacillales    | Lactobacillaceae      | <i>Lactobacillus</i>                                    | 2.366  | 12.211 | 3.08E-09 | 3.13E-08 |
| Bacteroidetes  | Bacteroidia         | Bacteroidales      | Bacteroidaceae        | <i>Bacteroides</i>                                      | 2.516  | 9.536  | 8.94E-09 | 8.47E-08 |
| Firmicutes     | Bacilli             | Lactobacillales    | Streptococcaceae      | <i>Streptococcus</i>                                    | -2.129 | 13.592 | 2.80E-08 | 2.34E-07 |
| Firmicutes     | Clostridia          | Clostridiales      | Ruminococcaceae       | CAG-352                                                 | -2.289 | 9.357  | 1.83E-07 | 1.44E-06 |
| Firmicutes     | Bacilli             | Lactobacillales    | Streptococcaceae      | <i>Lactococcus</i>                                      | -2.619 | 11.278 | 4.11E-07 | 3.06E-06 |
| Firmicutes     | Clostridia          | Clostridiales      | Family XI             | <i>Peptoniphilus</i>                                    | 2.270  | 9.706  | 4.31E-07 | 3.06E-06 |
| Firmicutes     | Bacilli             | Lactobacillales    | Lactobacillaceae      | <i>Lactobacillus</i>                                    | 3.106  | 12.635 | 8.78E-07 | 5.94E-06 |
| Firmicutes     | Clostridia          | Clostridiales      | Peptostreptococcaceae | <i>Romboutsia</i>                                       | -2.231 | 9.890  | 1.28E-06 | 8.29E-06 |
| Firmicutes     | Clostridia          | Clostridiales      | Family XI             | <i>Ezakiella</i>                                        | 2.657  | 11.157 | 1.40E-06 | 8.66E-06 |
| Firmicutes     | Clostridia          | Clostridiales      | Lachnospiraceae       | <i>Coprococcus</i> 2                                    | 2.237  | 10.821 | 5.96E-06 | 3.53E-05 |
| Firmicutes     | Clostridia          | Clostridiales      | Family XI             | <i>Anaerococcus</i>                                     | 2.139  | 10.496 | 1.43E-05 | 8.11E-05 |
| Firmicutes     | Erysipelotrichia    | Erysipelotrichales | Erysipelotrichaceae   | <i>Catenibacterium</i>                                  | 1.587  | 9.311  | 3.32E-04 | 1.75E-03 |
| Proteobacteria | Gammaproteobacteria | Enterobacteriales  | Enterobacteriaceae    | <i>Escherichia-Shigella</i>                             | -1.324 | 11.522 | 3.34E-04 | 1.75E-03 |
| Bacteroidetes  | Bacteroidia         | Bacteroidales      | Prevotellaceae        | <i>Prevotella</i> 9                                     | 1.595  | 9.679  | 6.57E-04 | 3.33E-03 |
| Bacteroidetes  | Bacteroidia         | Bacteroidales      | Bacteroidaceae        | <i>Bacteroides</i>                                      | -1.824 | 13.441 | 7.35E-04 | 3.60E-03 |
| Firmicutes     | Clostridia          | Clostridiales      | Lachnospiraceae       | <i>Blautia</i>                                          | -1.279 | 10.532 | 9.19E-04 | 4.35E-03 |
| Firmicutes     | Clostridia          | Clostridiales      | Lachnospiraceae       | <i>Roseburia</i>                                        | 1.719  | 12.225 | 1.48E-03 | 6.77E-03 |
| Firmicutes     | Bacilli             | Lactobacillales    | Lactobacillaceae      | <i>Lactobacillus</i>                                    | -1.462 | 10.450 | 1.62E-03 | 7.17E-03 |
| Bacteroidetes  | Bacteroidia         | Bacteroidales      | Tannerellaceae        | <i>Parabacteroides</i>                                  | -1.379 | 10.738 | 1.71E-03 | 7.37E-03 |
| Firmicutes     | Erysipelotrichia    | Erysipelotrichales | Erysipelotrichaceae   | <i>Coprobacillus</i>                                    | -1.355 | 9.598  | 1.90E-03 | 7.94E-03 |
| Firmicutes     | Clostridia          | Clostridiales      | Ruminococcaceae       | <i>Ruminococcaceae</i><br>UCG-013                       | 0.931  | 12.157 | 3.17E-03 | 1.29E-02 |
| Bacteroidetes  | Bacteroidia         | Bacteroidales      | Prevotellaceae        | <i>Alloprevotella</i>                                   | -1.383 | 10.235 | 3.73E-03 | 1.47E-02 |
| Firmicutes     | Bacilli             | Lactobacillales    | Leuconostocaceae      | <i>Weissella</i>                                        | 1.316  | 10.507 | 4.14E-03 | 1.59E-02 |
| Firmicutes     | Clostridia          | Clostridiales      | Ruminococcaceae       | <i>Eubacterium</i><br><i>coprostanoligenes</i><br>group | 1.325  | 10.815 | 6.39E-03 | 2.33E-02 |
| Firmicutes     | Clostridia          | Clostridiales      | Family XI             | <i>Anaerococcus</i>                                     | 1.495  | 11.156 | 6.67E-03 | 2.36E-02 |
| Firmicutes     | Clostridia          | Clostridiales      | Ruminococcaceae       | <i>Faecalibacterium</i>                                 | -1.263 | 9.643  | 6.82E-03 | 2.36E-02 |
| Firmicutes     | Clostridia          | Clostridiales      | Clostridiaceae 1      | <i>Clostridium sensu</i><br><i>stricto</i> 1            | 1.039  | 10.881 | 1.38E-02 | 4.68E-02 |

2 <sup>1</sup>logFC and logCPM refers to log fold change and log value of computes counts per million, respectively.

3 <sup>2</sup>FDR refers to false discovery rate and was computed using edgeR package in R.

4  
5

**Table S3.** Permutational multivariate analysis of variance (PERMANOVA) showing the effect of subgroups at different time, T0 and T8 in civilian and navy trainee groups.

| Subgroups                    | PERMANOVA      |         |         |                    |         |         |
|------------------------------|----------------|---------|---------|--------------------|---------|---------|
|                              | Civilian group |         |         | Navy trainee group |         |         |
|                              | pseudo-F       | p-value | q-value | pseudo-F           | p-value | q-value |
| Non-Smokers T0 vs. T8        | 0.392          | 1.000   | 1.000   | 0.899              | 0.596   | 0.650   |
| Smokers T0 vs. T8            | 0.131          | 1.000   | 1.000   | 0.629              | 0.922   | 0.976   |
| Non-drinkers T0 vs. T8       | 0.311          | 1.000   | 1.000   | 0.613              | 0.947   | 1.000   |
| Regular-drinkers T0 vs. T8   | 0.287          | 1.000   | 1.000   | 0.920              | 0.577   | 0.689   |
| 7–9 hours sleep T0 vs. T8    | 0.467          | 0.995   | 0.995   | 1.118              | 0.288   | 0.384   |
| < 7 hours sleep T0 vs. T8    | 0.425          | 0.991   | 0.995   | 1.312              | 0.386   | 0.463   |
| Regular-exercisers T0 vs. T8 | 0.245          | 0.997   | 1.000   | 0.786              | 0.769   | 0.814   |
| Non-exerciser T0 vs. T8      | 0.238          | 1.000   | 1.000   | 0.954              | 0.496   | 0.541   |
| Normal/underweight T0 vs. T8 | 0.497          | 0.989   | 1.000   | 0.533              | 0.965   | 1.000   |
| Overweight T0 vs. T8         | 0.294          | 0.995   | 1.000   | 1.089              | 0.314   | 0.480   |

6  
7  
8



**Table S4.** Feature selection analysis for gut microbiome in navy smokers and non-smokers at T0 vs. T8

| Subgroup      | Phylum         | Class            | Order              | Family              | Genus                              | <sup>1</sup> logFC  | <sup>1</sup> logCPM | p-value  | <sup>2</sup> FDR |          |
|---------------|----------------|------------------|--------------------|---------------------|------------------------------------|---------------------|---------------------|----------|------------------|----------|
| Smokers       | Firmicutes     | Clostridia       | Clostridiales      | Family XI           | <i>Ezakiella</i>                   | 6.94                | 12.34               | 6.15E-07 | 6.52E-05         |          |
|               | Firmicutes     | Clostridia       | Clostridiales      | Family XI           | <i>Ezakiella</i>                   | 5.73                | 11.19               | 2.22E-06 | 8.22E-05         |          |
|               | Actinobacteria | Actinobacteria   | Bifidobacteriales  | Bifidobacteriaceae  | <i>Bifidobacterium</i>             | 5.82                | 11.27               | 2.33E-06 | 8.22E-05         |          |
|               | Firmicutes     | Clostridia       | Clostridiales      | Family XI           | <i>Murdochiella</i>                | 5.70                | 11.30               | 4.38E-06 | 9.89E-05         |          |
|               | Firmicutes     | Clostridia       | Clostridiales      | Family XIII         | S5-A14a                            | 5.37                | 10.85               | 5.41E-06 | 9.89E-05         |          |
|               | Firmicutes     | Clostridia       | Clostridiales      | Family XIII         | <i>Mogibacterium</i>               | 5.39                | 10.87               | 5.67E-06 | 9.89E-05         |          |
|               | Firmicutes     | Clostridia       | Clostridiales      | Family XI           | <i>Peptoniphilus</i>               | 5.45                | 10.92               | 6.53E-06 | 9.89E-05         |          |
|               | Firmicutes     | Clostridia       | Clostridiales      | Lachnospiraceae     | <i>Coprococcus</i> 2               | 5.45                | 10.93               | 8.73E-06 | 1.16E-04         |          |
|               | Firmicutes     | Erysipelotrichia | Erysipelotrichales | Erysipelotrichaceae | <i>Turicibacter</i>                | -4.11               | 10.67               | 2.49E-05 | 2.79E-04         |          |
|               | Firmicutes     | Clostridia       | Clostridiales      | Ruminococcaceae     | <i>Ruminiclostridium</i> 5         | -4.45               | 10.25               | 4.22E-05 | 4.06E-04         |          |
|               | Bacteroidetes  | Bacteroidia      | Bacteroidales      | Porphyromonadaceae  | <i>Porphyromonas</i>               | 4.44                | 10.03               | 4.63E-05 | 4.09E-04         |          |
|               | Firmicutes     | Clostridia       | Clostridiales      | Ruminococcaceae     | <i>Ruminococcus</i> 1              | 4.03                | 9.95                | 1.12E-04 | 9.12E-04         |          |
|               | Firmicutes     | Bacilli          | Lactobacillales    | Streptococcaceae    | <i>Streptococcus</i>               | -5.32               | 13.80               | 2.91E-04 | 2.20E-03         |          |
|               | Firmicutes     | Clostridia       | Clostridiales      | Family XI           | <i>Peptoniphilus</i>               | 3.98                | 11.19               | 6.00E-04 | 4.24E-03         |          |
|               | Firmicutes     | Bacilli          | Lactobacillales    | Streptococcaceae    | <i>Streptococcus</i>               | -2.89               | 12.59               | 1.34E-03 | 8.87E-03         |          |
|               | Firmicutes     | Clostridia       | Clostridiales      | Clostridiaceae 1    | <i>Clostridium sensu stricto</i> 1 | -3.88               | 14.05               | 1.72E-03 | 1.07E-02         |          |
|               | Actinobacteria | Actinobacteria   | Bifidobacteriales  | Bifidobacteriaceae  | <i>Bifidobacterium</i>             | 5.42                | 10.93               | 1.88E-22 | 2.55E-20         |          |
|               | Firmicutes     | Erysipelotrichia | Erysipelotrichales | Erysipelotrichaceae | <i>Holdemanaella</i>               | -5.45               | 10.89               | 8.97E-17 | 6.10E-15         |          |
|               | Non-smokers    | Firmicutes       | Bacilli            | Lactobacillales     | Streptococcaceae                   | <i>Lactococcus</i>  | 3.47                | 9.98     | 1.04E-12         | 3.55E-11 |
|               |                | Bacteroidetes    | Bacteroidia        | Bacteroidales       | Prevotellaceae                     | <i>Prevotella</i> 9 | -3.16               | 9.15     | 4.10E-10         | 1.04E-08 |
| Firmicutes    |                | Erysipelotrichia | Erysipelotrichales | Erysipelotrichaceae | <i>Turicibacter</i>                | -3.70               | 10.84               | 4.58E-10 | 1.04E-08         |          |
| Bacteroidetes |                | Bacteroidia      | Bacteroidales      | Prevotellaceae      | <i>Prevotella</i> 9                | 3.11                | 9.19                | 1.02E-09 | 1.99E-08         |          |
| Firmicutes    |                | Clostridia       | Clostridiales      | Ruminococcaceae     | <i>Ruminococcus</i> 2              | -4.23               | 11.60               | 1.61E-09 | 2.74E-08         |          |
| Firmicutes    |                | Clostridia       | Clostridiales      | Ruminococcaceae     | <i>Ruminococcus</i> 2              | 3.72                | 10.82               | 8.51E-09 | 1.29E-07         |          |
| Bacteroidetes |                | Bacteroidia      | Bacteroidales      | Bacteroidaceae      | <i>Bacteroides</i>                 | 2.88                | 9.79                | 1.12E-07 | 1.52E-06         |          |
| Bacteroidetes |                | Bacteroidia      | Bacteroidales      | Prevotellaceae      | <i>Prevotella</i> 9                | 2.72                | 9.41                | 2.21E-07 | 2.73E-06         |          |
| Firmicutes    |                | Clostridia       | Clostridiales      | Ruminococcaceae     | CAG-352                            | -2.47               | 9.69                | 7.23E-06 | 7.56E-05         |          |
| Firmicutes    |                | Bacilli          | Lactobacillales    | Streptococcaceae    | <i>Lactococcus</i>                 | -2.60               | 11.66               | 3.87E-05 | 3.76E-04         |          |
| Firmicutes    |                | Bacilli          | Lactobacillales    | Lactobacillaceae    | <i>Lactobacillus</i>               | 1.54                | 11.42               | 5.34E-05 | 4.84E-04         |          |
| Firmicutes    |                | Bacilli          | Lactobacillales    | Lactobacillaceae    | <i>Lactobacillus</i>               | 3.02                | 13.22               | 8.82E-05 | 7.50E-04         |          |
| Firmicutes    |                | Bacilli          | Lactobacillales    | Streptococcaceae    | <i>Streptococcus</i>               | -1.73               | 13.57               | 1.26E-04 | 1.01E-03         |          |

|                |                  |                    |                       | <i>Eubacterium coprostanoligenes</i> |       |       |          |          |
|----------------|------------------|--------------------|-----------------------|--------------------------------------|-------|-------|----------|----------|
| Firmicutes     | Clostridia       | Clostridiales      | Ruminococcaceae       | group                                | 1.99  | 9.83  | 2.35E-04 | 1.77E-03 |
|                | Gammaproteoba    |                    |                       |                                      |       |       |          |          |
| Proteobacteria | acteria          | Enterobacteriales  | Enterobacteriaceae    | <i>Escherichia-Shigella</i>          | -1.57 | 11.65 | 3.77E-04 | 2.70E-03 |
| Firmicutes     | Clostridia       | Clostridiales      | Peptostreptococcaceae | <i>Romboutsia</i>                    | -1.83 | 9.94  | 1.08E-03 | 7.31E-03 |
| Firmicutes     | Erysipelotrichia | Erysipelotrichales | Erysipelotrichaceae   | <i>Coprobacillus</i>                 | -1.72 | 10.01 | 1.91E-03 | 1.14E-02 |
| Firmicutes     | Bacilli          | Lactobacillales    | Lactobacillaceae      | <i>Lactobacillus</i>                 | -1.78 | 10.73 | 1.93E-03 | 1.14E-02 |
| Bacteroidetes  | Bacteroidia      | Bacteroidales      | Prevotellaceae        | <i>Alloprevotella</i>                | -1.77 | 10.65 | 2.90E-03 | 1.64E-02 |
| Firmicutes     | Erysipelotrichia | Erysipelotrichales | Erysipelotrichaceae   | <i>Catenibacterium</i>               | 1.64  | 9.65  | 3.02E-03 | 1.64E-02 |
| Firmicutes     | Bacilli          | Lactobacillales    | Leuconostocaceae      | <i>Weissella</i>                     | 1.57  | 10.51 | 3.29E-03 | 1.72E-02 |
| Firmicutes     | Clostridia       | Clostridiales      | Ruminococcaceae       | <i>Ruminococcaceae</i> UCG-013       | 1.13  | 12.26 | 3.98E-03 | 2.01E-02 |
| Firmicutes     | Clostridia       | Clostridiales      | Lachnospiraceae       | <i>Coprococcus</i> 2                 | 1.62  | 10.76 | 5.26E-03 | 2.55E-02 |
| Bacteroidetes  | Bacteroidia      | Bacteroidales      | Prevotellaceae        | <i>Prevotella</i> 9                  | 1.62  | 10.06 | 5.45E-03 | 2.55E-02 |
| Firmicutes     | Clostridia       | Clostridiales      | Ruminococcaceae       | UBA1819                              | -1.44 | 10.94 | 9.37E-03 | 4.25E-02 |
| Bacteroidetes  | Bacteroidia      | Bacteroidales      | Bacteroidaceae        | <i>Bacteroides</i>                   | -1.67 | 13.59 | 9.69E-03 | 4.25E-02 |

10 <sup>1</sup>logFC and logCPM refers to log fold change and log value of computes counts per million, respectively.<sup>2</sup>FDR refers to false discovery rate and was computed using  
11 edgeR package in R.
